# Supplementary material
Source: HighWire-hosted journal article supplement (https://www.rcpjournals.org/highwire/filestream/11175/field_highwire_adjunct_files/0/Pendlebury_Supplementary_S1.pdf)
Supplement: Pendlebury_Supplementary_S1.pdf [file Pendlebury_Supplementary_S1.pdf]

**Impact of a system-wide multicomponent intervention on administrative diagnostic coding for delirium and other cognitive frailty syndromes: Observational prospective study**

Clerking Proforma

Space for Patient Information Sticker

|                      |
|----------------------|
| Assessment date/time |
| Consultant/team      |
| Assessing doctor     |
| GP/ED/other referral |

Cognitive screen

Complete on **ALL** patients  $\geq 70$  yrs and  $< 70$  yrs if confusion/altered behaviour, alcohol hx or brain disease e.g. stroke, PD, MS.

**1. Does the patient have a known diagnosis of dementia?**     Y     N     uncertain

|                         |                         |                                                                                                                                                                                                                                                                              |
|-------------------------|-------------------------|------------------------------------------------------------------------------------------------------------------------------------------------------------------------------------------------------------------------------------------------------------------------------|
| Age                     | Recognise 2 people      | 1. Acute onset &/or fluctuating confusion/altered behaviour<br>2. Inattention e.g. unable to do 20 - 1 or distractable<br>3. Altered conscious level e.g. agitated or sleepy<br>4. Disordered thinking (e.g. rambling)<br>CAM: Delirium = 1+2+(3 or 4) OR clinical diagnosis |
| Time (nearest hr)       | DOB                     |                                                                                                                                                                                                                                                                              |
| Recall (42 West Street) | WW2 (start or end year) |                                                                                                                                                                                                                                                                              |
| Year                    | Monarch                 |                                                                                                                                                                                                                                                                              |
| Location                | 20 to 1 backwards       |                                                                                                                                                                                                                                                                              |

**2. AMTS Total=    /10.**  
 AMTS not done  Reason:

**3. Does the patient have delirium?**     Y     N     uncertain

Fig S1. Cognitive screen delivered via the paper clerking proforma piloted in 2010 and rolled out in 2012 to acute medicine, geratology and acute ambulatory services. The cognitive screen is mandatory for patients aged  $\geq 70$  years with unplanned admission and younger patients with brain at-risk (eg stroke, Parkinson's disease, multiple sclerosis, alcohol excess) or altered behaviour.

Cognitive Screen - ZZZXXBERENDT, ANTHONY

\*Performed on: 05/07/2013 1749 BST By: Berendt, Anthony Robert

### Cognitive Screen

Is AMTS feasible?  Yes  No Reason AMTS not done

Age  Yes  No  Too unwell  
 Uncooperative  
 Dysphasic  
 Language barrier  
 Other:

Year  Yes  No Date of birth  Yes  No

Time (nearest hour)  Yes  No Year of 2nd WW (start or end)  Yes  No

Now ask patient to remember this address: 42 West Street Monarch  Yes  No

Location  Yes  No Count backwards (from 20 to 1)  Yes  No

Recognise 2 people (eg doctor, nurse)  Yes  No Recall 42 west Street  Yes  No

AMTS score 10

Does the patient have a known diagnosis of dementia?  Yes  No  Uncertain

### Aid to identify delirium (CAM)

1. Acute onset and/or fluctuating confusion/ altered behaviour  
 2. Inattention (unable to do 20-1 or distractable)  
 3. Altered conscious level (agitated or sleepy)  
 4. Disordered thinking (rambling)

Delirium exists if patient satisfies conditions: 1 + 2 + (3 or 4)  
 but note that CAM sensitivity is not 100% particularly for hypoactive (SLEEPY) delirium, so if patient has clinical diagnosis of delirium, even if CAM negative, select "yes".

Does the patient have delirium?  Yes  No  Uncertain

Forgetfulness in the last 12 months  Yes  No  Not assessable

Have you/has the patient been more forgetful in the past 12 months to the extent that it has significantly affected you/their daily life?

In Progress

Fig S2. Cognitive screen delivered via the electronic patient record (EPR) rolled out trust-wide in 2015 replacing the paper proforma. The cognitive screen is mandatory for patients aged  $\geq 70$  years with unplanned admission and for younger patients with brain at-risk (eg stroke, Parkinson's disease, multiple sclerosis, alcohol excess) or altered behaviour.
